# Supplementary material for: Vapor-assisted self-conversion of basic carbonates in metal–organic frameworks
Source: Royal Society of Chemistry journal article supplement (doi:10.1039/d0nr07700c), 2021-01-01
Supplement: d0nr07700c1.pdf [file d0nr07700c1.pdf]

## **Electronic Supplementary Information**

# **Vapor-assisted self-conversion of basic carbonates in metal-organic frameworks**

Miaomiao Jia, Jingyi Su, Pengcheng Su, Wanbin Li\*

Guangdong Key Laboratory of Environmental Pollution and Health, School of Environment,

Jinan University, Guangzhou 511443, P.R. China

E-mail: gandeylin@126.com

This file includes:

Supplementary Figures S1 to S14

Supplementary Tables S1 and S8

Supplementary References 1 to 35

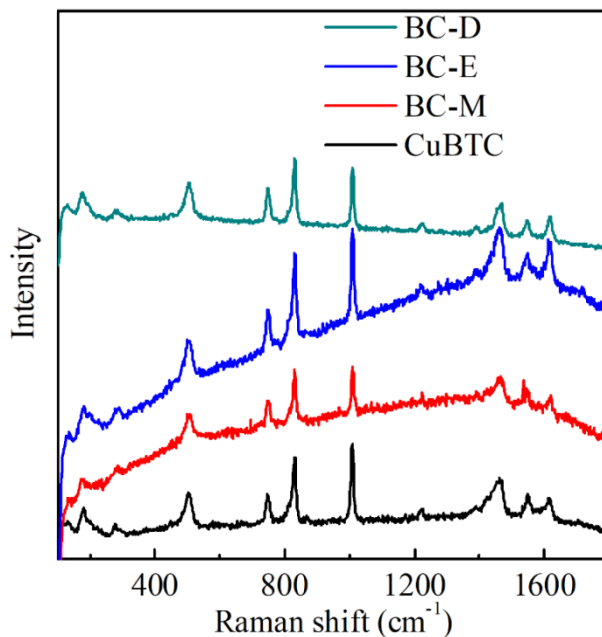

**Fig. S1** Raman spectra of CuBTC and BC-CuBTC.

In the Raman spectra of the CuBTC and BC-CuBTC materials, the bands with peaks at 1460 and 1544  $\text{cm}^{-1}$  were corresponded to O-C-O symmetric and asymmetric. The peak intensity of Cu-O<sub>w</sub> at 277  $\text{cm}^{-1}$  and Cu-O at 501  $\text{cm}^{-1}$  in BC-CuBTC-M, BC-CuBTC-E, and BC-CuBTC-D showed some decrease compared with that of CuBTC<sup>1</sup>. The C-N peak belonging to DMF also exists at 866  $\text{cm}^{-1}$  for CuBTC and BC-CuBTC materials. This indicates that solvent vapor-assisted thermal treatment cannot remove guest molecules in CuBTC.

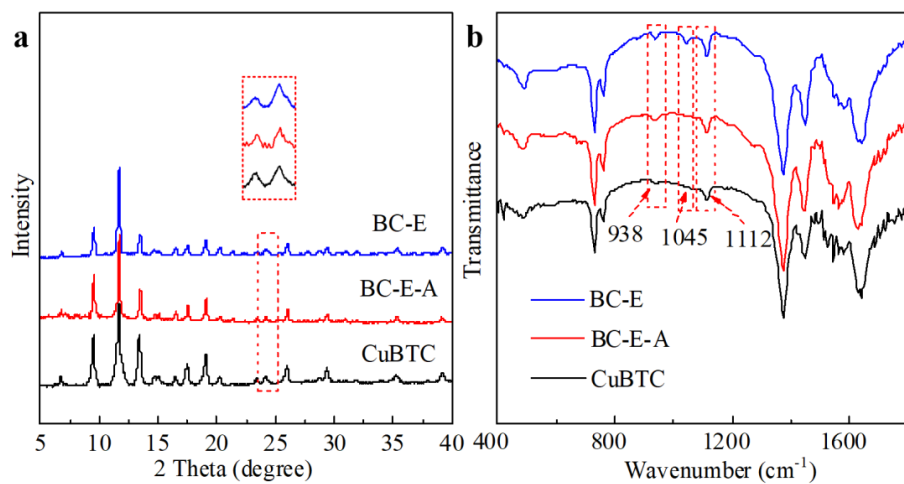

Fig. S2 (a) PXRD patterns and (b) FTIR spectra of CuBTC, BC-CuBTC-E-A, and BC-CuBTC-E.

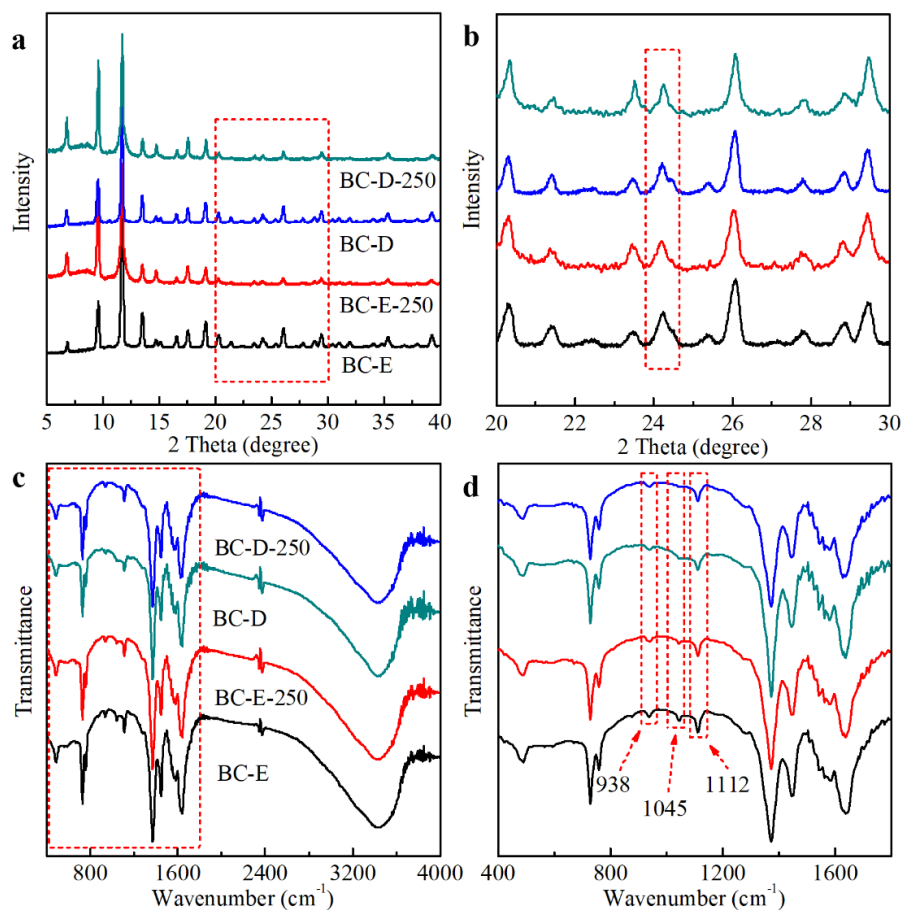

**Fig. S3** (a,b) PXRD patterns and (c,d) FTIR spectra of BC-CuBTC-E, BC-CuBTC-E-250, BC-CuBTC-D, and BC-CuBTC-D-250.

The BC-CuBTC-E-250 and BC-CuBTC-D-250 materials were prepared by thermal treating BC-CuBTC-E and BC-CuBTC-D in vacuum at 250 °C for 8 h.

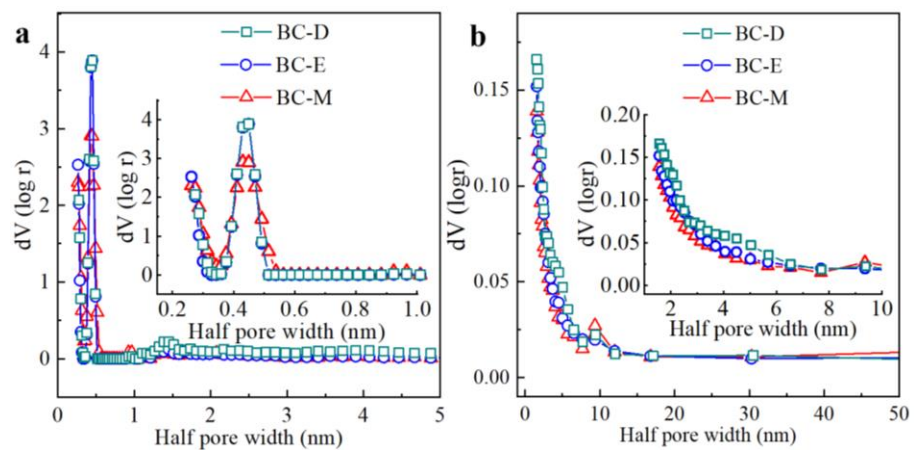

**Fig. S4** Pore width distributions of BC-CuBTC from (a) density functional theory (DFT) method and (b) Barrett-Joyner-Halenda (BJH) method.

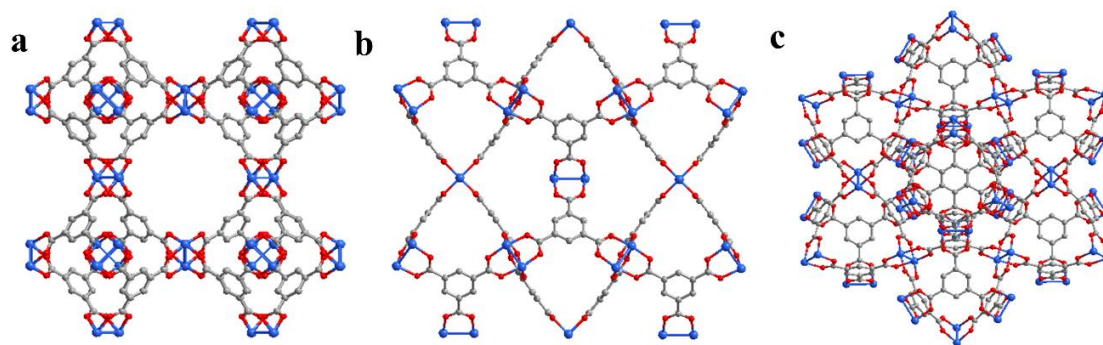

**Fig. S5** CuBTC structure viewed at (a)  $\{100\}$ , (b)  $\{110\}$ , and (c)  $\{111\}$  facets.

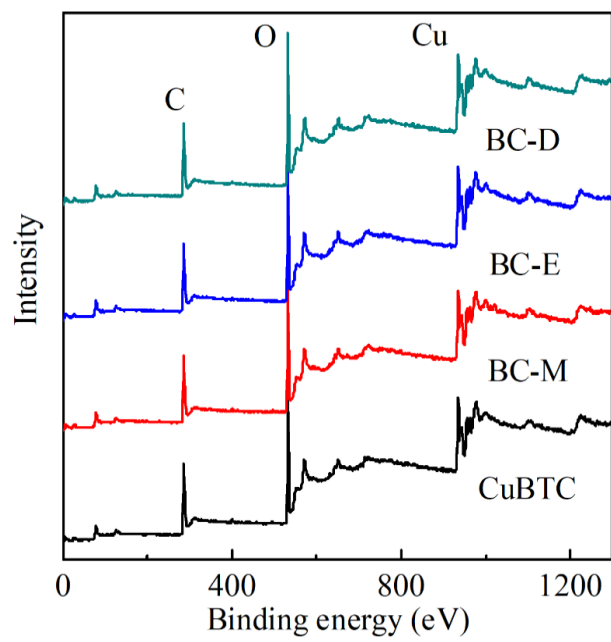

**Fig. S6** XPS spectra of CuBTC, BC-CuBTC-M, BC-CuBTC-E, and BC-CuBTC-D.

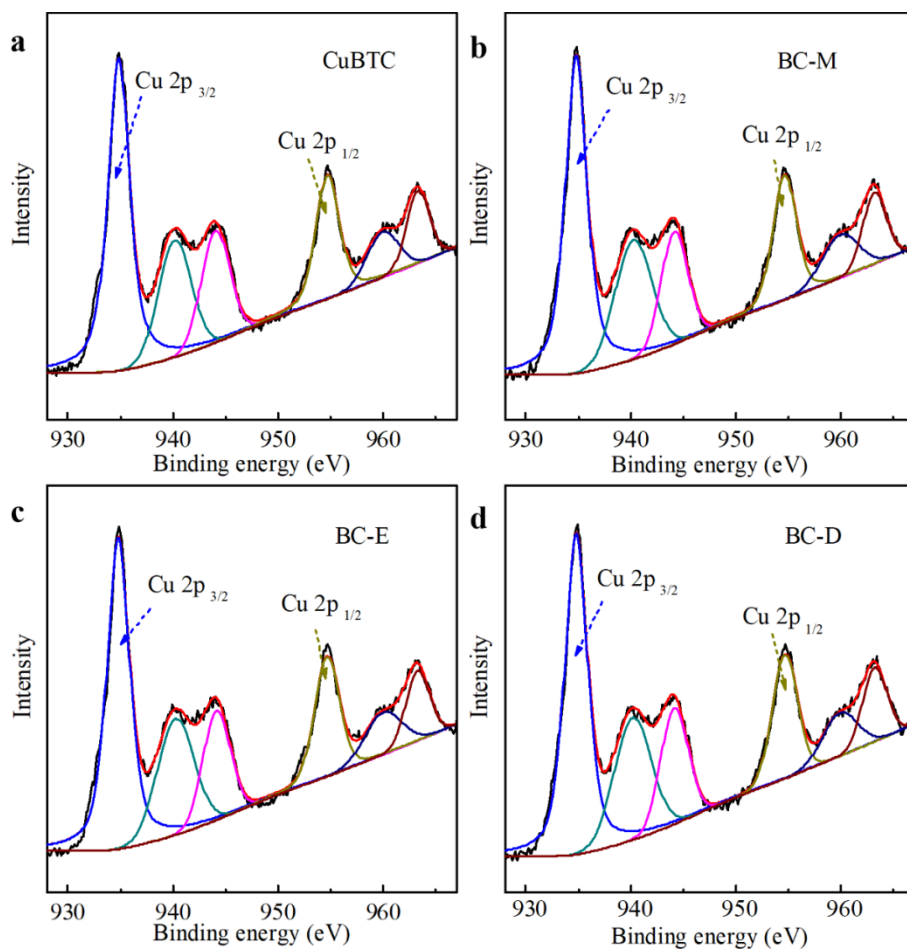

**Fig. S7** (a) Cu 2p XPS profiles of (a) CuBTC, (b) BC-CuBTC-M, (c) BC-CuBTC-E, and (d) BC-CuBTC-D.

The high-resolution Cu 2p spectra showed that all samples had two main characteristic peaks of Cu 2p<sub>3/2</sub> at 935.0 eV and Cu 2p<sub>1/2</sub> at 954.9 eV, and four shake-up satellite peaks in the range of 930–965 eV. It could be confirmed that all Cu centers in CuBTC and BC-CuBTC existed in state of +2 valence.<sup>2,3</sup>



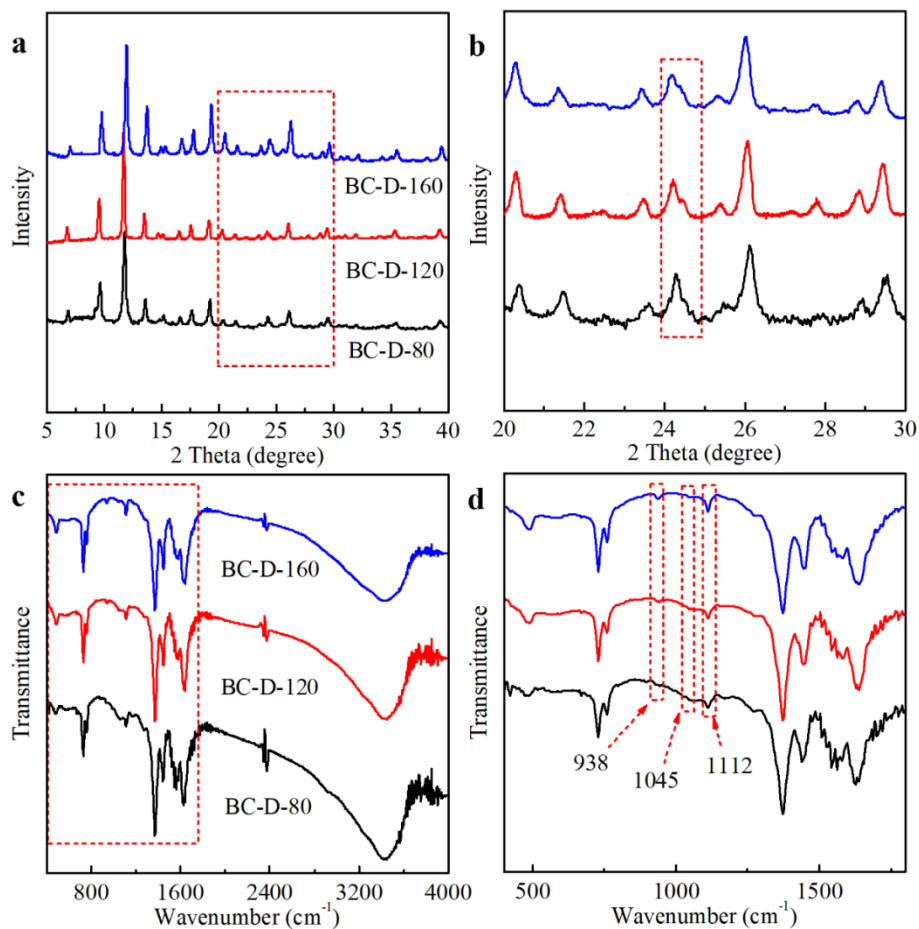

**Fig. S8** (a,b) PXRD patterns and (c,d) FTIR spectra of BC-CuBTC-D-80, BC-CuBTC-D-120, and BC-CuBTC-D-160. The BC-CuBTC-D-80 and BC-CuBTC-D-160 were prepared with DMF solvent at 80 and 160 °C, respectively.

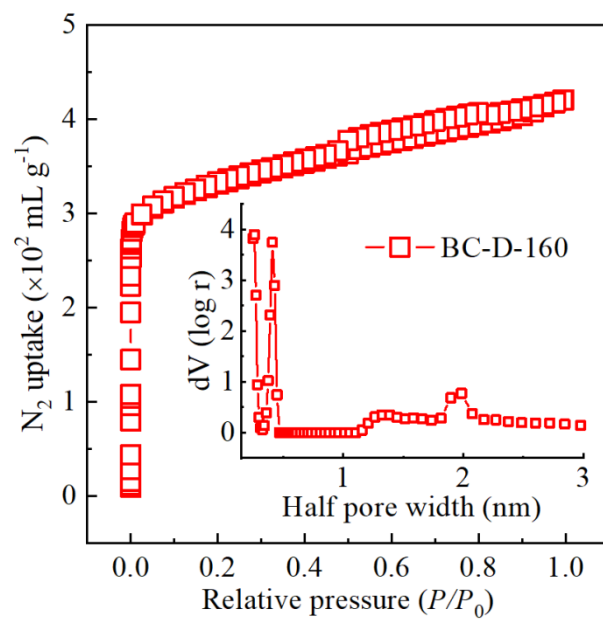

**Fig. S9**  $N_2$  adsorption-desorption isotherms and pore width distribution of BC-CuBTC-160.

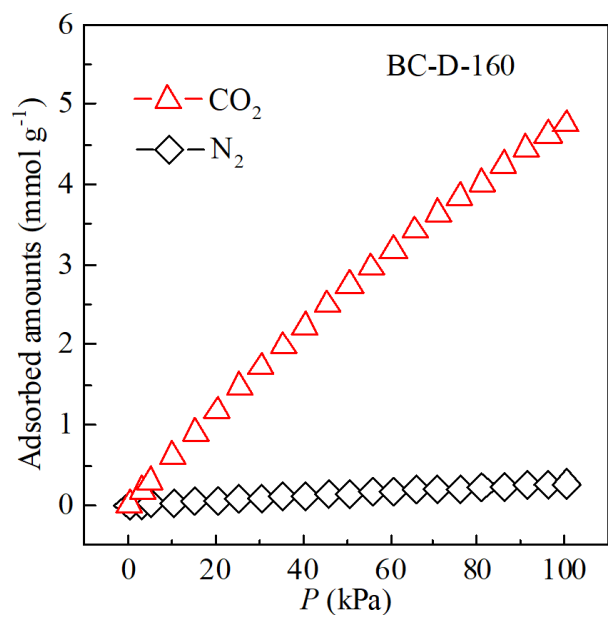

**Fig. S10**  $\text{CO}_2$  and  $\text{N}_2$  adsorption isotherms of BC-CuBTC-D-160.

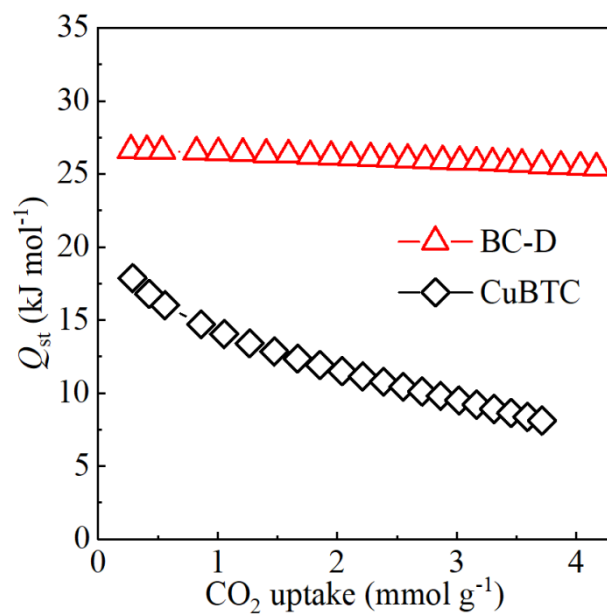

**Fig. S11** Isosteric heat of adsorption ( $Q_{st}$ ) for  $\text{CO}_2$  of CuBTC and BC-CuBTC-D versus  $\text{CO}_2$  uptake.

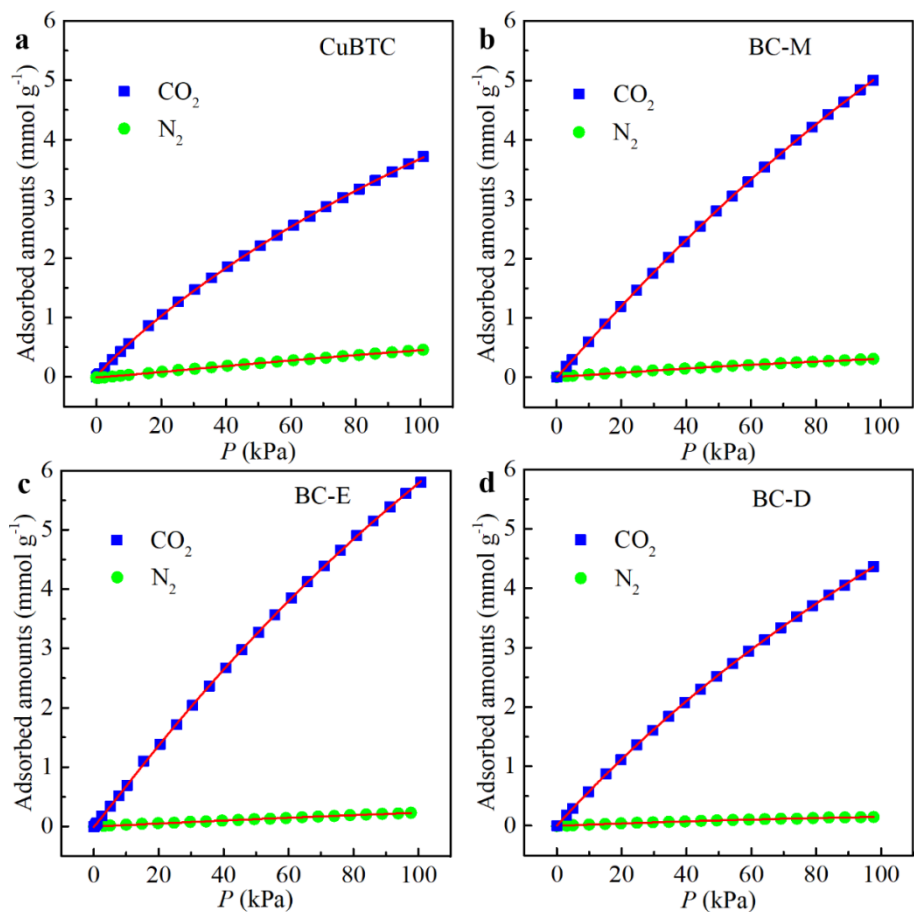

**Fig. S12** CO<sub>2</sub> and N<sub>2</sub> adsorption isotherms of (a) CuBTC, (b) BC-CuBTC-M, (c) BC-CuBTC-E, and (d) BC-CuBTC-D. The isotherms were fitted by lines from single-site Langmuir-Freundlich equation.

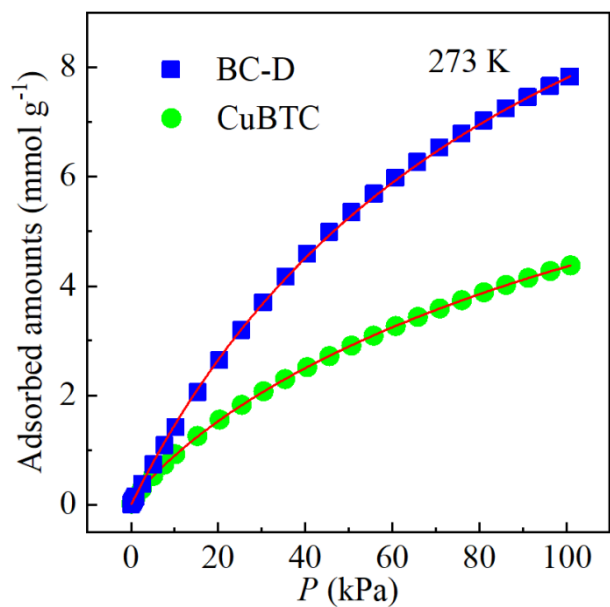

**Fig. S13** CO<sub>2</sub> adsorption isotherms of CuBTC and BC-CuBTC-D-160 at 273 K. The isotherms were fitted by lines from single-site Langmuir-Freundlich equation.

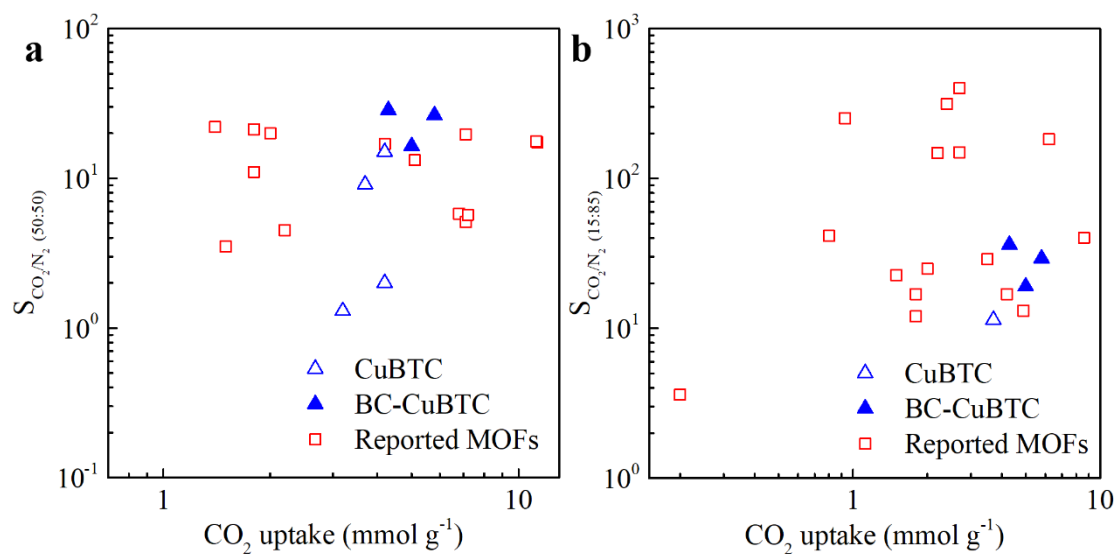

**Fig. S14** Comparison of CuBTC and BC-CuBTC with other MOF materials in carbon capture for (a)  $\text{CO}_2/\text{N}_2$  (50:50) and (b)  $\text{CO}_2/\text{N}_2$  (15:85) mixtures.

**Table S1** Peak intensity ratios for CuBTC and BC-CuBTC from PXRD patterns.

| Samples    | {220}/{222} | {400}/{222} |
|------------|-------------|-------------|
| CuBTC      | 0.60        | 0.66        |
| BC-CuBTC-M | 0.20        | 0.32        |
| BC-CuBTC-E | 0.32        | 0.25        |
| BC-CuBTC-D | 0.38        | 0.25        |



**Table S2** Porous properties of CuBTC and BC-CuBTC.

| Samples            | BET surface                            | Pore area (m <sup>2</sup> g <sup>-1</sup> ) |          | Pore volume (mL g <sup>-1</sup> ) |          |
|--------------------|----------------------------------------|---------------------------------------------|----------|-----------------------------------|----------|
|                    | area (m <sup>2</sup> g <sup>-1</sup> ) | Micropore                                   | Mesopore | Micropore                         | Mesopore |
| CuBTC <sup>4</sup> | 1329                                   | 1282                                        | 47.8     | 0.49                              | 0.010    |
| BC-CuBTC-M         | 1813                                   | 1745                                        | 68.8     | 0.71                              | 0.080    |
| BC-CuBTC-E         | 1811                                   | 1734                                        | 76.7     | 0.71                              | 0.022    |
| BC-CuBTC-D         | 1843                                   | 1743                                        | 99.6     | 0.73                              | 0.033    |
| BC-CuBTC-D-160     | 1270                                   | 1065                                        | 205      | 0.50                              | 0.100    |

**Table S3** Gas areas and proportions of the air in container before and after self-conversion.

|            | $A_{CO_2}$ | $A_{N_2+O_2}$ | $A_{CO_2}/A_{N_2+O_2+CO_2}(\%)$ |
|------------|------------|---------------|---------------------------------|
| Air        | 940.69     | 3101649       | 0.030                           |
| BC-CuBTC-M | 4446.92    | 4629069       | 0.096                           |
| BC-CuBTC-E | 5015.28    | 4978704       | 0.101                           |
| BC-CuBTC-D | 4784.46    | 4931216       | 0.097                           |

**Table S4** Element content of CuBTC and BC-CuBTC from XPS.

| Materials  | C (%) | O (%) | Cu (%) |
|------------|-------|-------|--------|
| CuBTC      | 55.61 | 35.95 | 8.43   |
| BC-CuBTC-M | 54.86 | 36.22 | 8.92   |
| BC-CuBTC-E | 54.10 | 36.64 | 9.26   |
| BC-CuBTC-D | 55.19 | 35.99 | 8.82   |

**Table S5** Chemical bond content of CuBTC and BC-CuBTC from C 1s XPS.

| Materials  | C-H | C-C   | C=C (%) | C-COOH (%) | O-C=O (%) | CO <sub>3</sub> <sup>2-</sup> (%) |
|------------|-----|-------|---------|------------|-----------|-----------------------------------|
| CuBTC      |     | 60.94 |         | 15.89      | 23.19     | 0                                 |
| BC-CuBTC-M |     | 53.10 |         | 25.74      | 15.19     | 5.97                              |
| BC-CuBTC-E |     | 51.55 |         | 25.77      | 14.47     | 8.21                              |
| BC-CuBTC-D |     | 53.71 |         | 24.66      | 14.61     | 7.02                              |

**Table S6**  $\text{Cu}_2(\text{OH})_2\text{CO}_3$  content of CuBTC and BC-CuBTC.

| Materials  | $\text{Cu}_2(\text{OH})_2\text{CO}_3$ (wt %) |
|------------|----------------------------------------------|
| CuBTC      | 0                                            |
| BC-CuBTC-M | 2.34                                         |
| BC-CuBTC-E | 3.91                                         |
| BC-CuBTC-D | 1.88                                         |

**Table S7** Comparison of CuBTC and BC-CuBTC with other MOF materials reported in previous studies for carbon capture at 100 kPa. \*Henry's law.

| Materials              | $S_{\text{BET}}$ ( $\text{m}^2 \text{g}^{-1}$ ) | Temp (K) | Capacity ( $\text{mmol g}^{-1}$ ) |              | IAST selectivity | Ref    |
|------------------------|-------------------------------------------------|----------|-----------------------------------|--------------|------------------|--------|
|                        |                                                 |          | $\text{CO}_2$                     | $\text{N}_2$ |                  |        |
| CuBTC                  | 1482                                            | 295      | 3.5                               | 0.3          |                  | 5      |
| CuBTC                  | 1272                                            | 298      | 4.1                               |              |                  | 6      |
| CuBTC/MoS <sub>2</sub> | 1639                                            | 298      | 4.6                               |              |                  | 6      |
| CuBTC                  | 1492                                            | 298      | 4.2                               | 0.4          | 15.0 (50/50)     | 7      |
| CuBTC                  | 1448                                            | 298      | 4.0                               |              |                  | 8      |
| CuBTC/HCM              | 516                                             | 298      | 2.8                               | 0.3          |                  | 8      |
| CuBTC                  | 933                                             | 298      | 2.8                               |              |                  | 9      |
| CuBTC/GO               | 837                                             | 298      | 3.4                               |              |                  | 9      |
| CuBTC                  | 1781                                            | 298      | 4.1                               |              |                  | 10     |
| CuBTC                  | 1080                                            | 298      | 3.2                               | 0.37         | 1.3 (50:50)      | 11     |
| CuBTC/PEI              | 886                                             | 298      | 4.2                               | 0.45         | 2.0 (50:50)      | 11     |
| CuBTC/AC-2             | 1381                                            | 298      | 5.4                               | 0.2          |                  | 12     |
| CuBTC/GO               | 1367                                            | 298      | 12.5                              | 2.2          |                  | 13     |
| Mg-MOF-74              | 1640                                            | 296      | 6.2                               | 0.2          | 182.1 (15/85)    | 14-16  |
| MOF-177                |                                                 | 296      | 0.2                               | 0.2          | 3.6 (15/85)      | 15, 16 |
| USTA-16                | 628                                             | 296      | 2.4                               | 0.04         | 314.7 (15/85)    | 16, 17 |
| rth-MOF-7              | 1900                                            | 298      | 3.5                               |              | 25.0 (10/90)     | 17-19  |

|                                        |           |     |      |      |                          |        |
|----------------------------------------|-----------|-----|------|------|--------------------------|--------|
| SiFSIX-2-Cu                            | 3140      | 298 | 1.8  | 0.2  | 13.7 (10/90)             | 19, 20 |
| ZIF-78                                 |           | 296 | 0.8  | 0.1  | 41.4 (15/85)             | 19, 21 |
| MIL-47                                 |           | 298 | 7.1  | 0.4  | 19.7 (50:50)             | 22     |
| IRMOF-1                                |           | 298 | 6.8  | 1.3  | 5.8 (50:50)              | 22     |
| IRMOF-11                               |           | 298 | 11.3 | 0.8  | 17.4 (50:50)             | 22     |
| IRMOF-12                               |           | 298 | 7.1  | 1.4  | 5.1 (50:50)              | 22     |
| IRMOF-13                               |           | 298 | 11.2 | 0.8  | 17.6 (50:50)             | 22     |
| IRMOF-14                               |           | 298 | 7.2  | 1.6  | 5.7 (50:50)              | 22     |
| Zn <sub>4</sub> O(BDC) <sub>3</sub>    | 1200-1900 | 298 | 5.1  | 3.5  | 13.2 (50:50)             | 23     |
| [Cu <sub>2</sub> (BPDC) <sub>2</sub> ] | 1280      | 298 | 8.6  | 0.6  | 40.2 (15:85)             | 23     |
| NTU-101-Cu                             | 2017      | 273 | 4.5  | 0.3  |                          | 24     |
| IITKGP-11                              | 253       | 295 | 2.7  | 0.2  | 149 (15:85 )             | 25     |
| MIL-101(Cr)                            | 3150      | 298 | 2.0  | 0.2  | 25 (15:85)<br>20 (50:50) | 26     |
| MIL-101(Cr)                            | 3355      | 298 | 1.8  | 0.2  | 12 (15:85)<br>11 (50:50) | 26     |
| MOF-505                                | 1076      | 298 | 3.5  | 0.3  | 29 (15:85)               | 27     |
| IITKGP-5                               | 366       | 295 | 2.2  | 0.2  | 148 (15:85)              | 28     |
| NENU-520                               | 387       | 298 | 2.7  | 0.01 | 400 (15:85)              | 29     |
| ZIF-300                                | 420       | 298 | 1.4  | 0.1  | 22 (50:50)*              | 30     |
| MOF-508b                               |           | 303 | 2.2  | 1.1  | 4.5 (50:50)              | 31     |
| ROD-6                                  | 345       | 298 | 1.8  | 0.17 | 16.9 (15:85)             | 32     |

---

|                                  |      |     |                   |                   |               |           |
|----------------------------------|------|-----|-------------------|-------------------|---------------|-----------|
|                                  |      |     |                   |                   | 21.2 (50:50)  |           |
|                                  |      |     |                   |                   | 22.7 (15:85)  |           |
| ROD-7                            | 1189 | 298 | 1.5               | 0.1               | 3.5 (50:50)   | 32        |
| NU-1000                          | 2320 | 293 | 1.8               | 0.2               | 7.9 (10:90)   | 33        |
| [Zn(L)·H <sub>2</sub> O]·D<br>MA | 185  | 273 | 0.93              | 0.3               | 252.0 (15:85) | 34        |
| LCU-105                          | 835  | 298 | 4.9 (0.75<br>bar) | 0.5 (0.75<br>bar) | 13.1 (15:85)  | 35        |
| LCU-106                          | 620  | 298 | 4.2 (0.75<br>bar) | 0.3 (0.75<br>bar) | 16.9 (15:85)  | 35        |
| CuBTC                            | 1329 | 298 | 3.7               | 0.5               | 11.4 (15:85)  | 4         |
|                                  |      |     |                   |                   | 9.1 (50:50)   | This work |
| BC-CuBTC-M                       | 1813 | 298 | 5.0               | 0.3               | 19.0 (15:85)  | This work |
|                                  |      |     |                   |                   | 16.4 (50:50)  |           |
| BC-CuBTC-E                       | 1811 | 298 | 5.8               | 0.2               | 29.2 (15:85)  | This work |
|                                  |      |     |                   |                   | 26.4 (50:50)  |           |
| BC-CuBTC-D                       | 1843 | 298 | 4.3               | 0.1               | 36.1 (15:85)  | This work |
|                                  |      |     |                   |                   | 28.5 (50:50)  |           |

---



**Table S8** Parameters in the single-site Langmuir-Freundlich equation fitted to adsorption of pure CO<sub>2</sub> and N<sub>2</sub> at 273 and 298 K.

| Materials  | gas                     | a        | b       | n       |
|------------|-------------------------|----------|---------|---------|
|            | CO <sub>2</sub> (273 K) | 11.57832 | 0.01164 | 0.8573  |
| CuBTC      | CO <sub>2</sub>         | 14.55524 | 0.00466 | 0.93023 |
|            | N <sub>2</sub>          | 1.89849  | 0.0017  | 1.136   |
| BC-CuBTC-M | CO <sub>2</sub>         | 21.13285 | 0.00271 | 1.03485 |
|            | N <sub>2</sub>          | 0.77935  | 0.00317 | 1.15137 |
| BC-CuBTC-E | CO <sub>2</sub>         | 22.42368 | 0.00287 | 1.0417  |
|            | N <sub>2</sub>          | 0.9521   | 0.002   | 1.10076 |
|            | CO <sub>2</sub> (273 K) | 15.32211 | 0.01061 | 0.99527 |
| BC-CuBTC-D | CO <sub>2</sub>         | 17.49284 | 0.00348 | 0.99488 |
|            | N <sub>2</sub>          | 0.33777  | 0.00397 | 1.15364 |

## References

1. S.-C. Qi, X.-Y. Qian, Q.-X. He, K.-J. Miao, Y. Jiang, P. Tan, X.-Q. Liu and L.-B. Sun, *Angew. Chem. Int. Ed.*, 2019, **58**, 10104–10109.
2. A. A. Talin, A. Centrone, A. C. Ford, M. E. Foster, V. Stavila, P. Haney, R. A. Kinney, V. Szalai, F. E. Gabaly, H. P. Yoon, F. Léonard and M. D. Allendorf, *Science*, 2014, **343**, 66–69.
3. A. S. Hall, A. Kondo, K. Maeda and T. E. Mallouk, *J. Am. Chem. Soc.*, 2013, **135**, 16276–16279.
4. M. Jia, L. Mai, Z. Li and W. Li, 2020, **12**, 14171–14179.
5. P. Chowdhury, C. Bikkin, D. Meister, F. Dreisbach and S. Gumma, *Microporous Mesoporous Mater.*, 2009, **117**, 406–403.
6. X. Mu, S. Liu, Y. Chen, U. Kei Cheang, M. W. George and T. Wu, *Ind. Eng. Chem. Res.*, 2020, **59**, 5808–5817.
7. A. O. Yazaydin, A. I. Benin, S. A. Faheem, P. Jakubczak, J. J. Low, R. R. Willis and R. Q. Snurr, *Chem. Mater.*, 2009, **21**, 1425–1430.
8. D. Qian, C. Lei, G.-P. Hao, W.-C. Li and A.-H. Lu, *ACS Appl. Mater. Interfaces*, 2012, **4**, 6125–6132.
9. Z. J. Bian, J. Xu, S. P. Zhang, X. M. Zhu, H. L. Liu and J. Hu. *Langmuir*, 2015, **31**, 7410–7417.
10. A. R. Millward and O. M. Yaghi, *J. Am. Chem. Soc.*, 2005, **127**, 17998–17999.
11. A. Aarti, S. Bhadauria, A. Nanoti, S. Dasgupta, S. Divekar, P. Gupta and R. Chauhan, *RSC Adv.*, 2016, **6**, 93003–93009.

12. H. J. Park and, M. P. Suh, *Chem. Sci.*, 2013, **4**, 685–690.
13. A. Policicchio, Y. Zhao, Q. Zhong, R. G. Agostino and T. J. Bandosz, *ACS Appl. Mater. Interfaces*, 2014, **6**, 101–108.
14. P. D. C. Dietzel, V. Besikiotis and R. Blom, *J. Mater. Chem.*, 2009, **19**, 7362–7370.
15. J. A. Mason, K. Sumida, Z. R. Herm, R. Krishna and J. R. Long, *Energy Environ. Sci.*, 2011, **4**, 3030–3040.
16. S. Xiang, Y. He, Z. Zhang, H. Wu, W. Zhou, R. Krishna, B. Chen, *Nat. Commun.*, 2012, **3**, 954.
17. Y. Belmabkhout, V. Guillerm, M. Eddaoudi and Y. Belmabkhout, *Chem. Eng. J.*, 2016, **296**, 386–397.
18. R. Luebke, J. F. Eubank, A. J. Cairns, Y. Belmabkhout, L. Wojtas and M. Eddaoudi, *Chem. Commun.*, 2012, **48**, 1455–1457.
19. M. Oschatz and M. Antonietti, *Energy Environ. Sci.*, 2018, **11**, 57–70.
20. P. Nugent, Y. Belmabkhout, S. D. Burd, A. J. Cairns, R. Luebke, K. Forrest, T. Pham, S. Ma, B. Space, L. Wojtas, M. Eddaoudi and M. J. Zaworotko, *Nature*, 2013, **495**, 80–84.
21. R. Banerjee, H. Furukawa, D. Britt, C. Knobler, M. O’Keeffe and O. M. Yaghi, *J. Am. Chem. Soc.*, 2009, **131**, 3875–3877.
22. B. Liu, B. Smit, *Langmuir*, 2009, **25**, 5918–5926.
23. C. He, C. Hou, Y. M. Wang, X. Y. Gong, H. L. Jiang, Y. B. Sun, K. Liu and X. Q. Cao, *CrystEngComm*, 2020, **22**, 3378–3384.

24. X.-J. Wang, P.-Z. Li, L. Liu, Q. Zhang, P. Borah, J. D. Wong, X. X. Chan, G. Rakesh, Y. Lia and Y. Zhao, *Chem. Commun.*, 2012, **48**, 10286–10288.
25. A. Pal, S. Chand, D. G. Madden, D. Franz, L. Ritter, A. Johnson, B. Space, T. Curtin and M. C. Das, *Inorg. Chem.*, 2019, **5**, 11553–11560.
26. Y. Lin, H. Lin, H. Wang, Y. Suo, B. Li, C. Kong and L. Chen, *J. Mater. Chem. A*, 2014, **2**, 14658–14665.
27. Y. Chen, H. Wu, Q. Xiao, D. Lv, F. Li, Z. Li and Q. Xia, *CrystEngComm*, 2019, **21**, 165–171.
28. A. Pal, S. Chand, S. M. Elahi and M. C. Das, *Dalton Trans.*, 2017, **46**, 15280–15286.
29. S. Bao, R. Krishna, Y. He, J. Qin, Z. Su, S. Li, W. Xie, D. Du, W. He, S. Zhang and Y. Lan, *J. Mater. Chem. A*, 2015, **3**, 7361–7367.
30. N. T. T. Nguyen, H. Furukawa, F. Gándara, H. T. Nguyen, K. E. Cordova and O. M. Yaghi, *Angew. Chem. Int. Ed.*, 2014, **53**, 10645–10648.
31. L. Bastin, P. S. Barcia, E. J. Hurtado, J. A. C. Silva, A. E. Rodrigues and B. Chen, *J. Phys. Chem. C*, 2008, **112**, 1575–1581.
32. R.-J. Li, M. Li, X.-P. Zhou, D. Li and M. O’Keeffe, *Chem. Commun.*, 2014, **50**, 4047–4049.
33. P. Deria, J. E. Mondloch, E. Tylianakis, P. Ghosh, W. Bury, R. Q. Snurr, J. T. Hupp and O. K. Farha, *J. Am. Chem. Soc.*, 2013, **135**, 16801–16804.
34. X. Lv, L. Li, S. Tang, C. Wang and X. Zhao, *Chem. Commun.*, 2014, **50**, 6886–6889.

35. H. Y. Ma, Y. Z. Zhang, H. Yan, W. J. Zhang, Y. W. Li, S. N. Wang, D. C. Li, J. M.

Dou and J. R. Li, *Dalton Trans.*, 2019, **48**, 13541–13545.
